# Supplementary material
Source: PubMed Central journal article supplement (PMC2805481)
Supplement: jc.2009-1346_1.pdf [file jc.2009-1346_1.pdf]

Supplementary Table: Free Testosterone Levels at each visit by treatment group and age.

|              |                                  |    | Free Testosterone pmoles/L.<br>mean (S.D.) |                  |                               |                   |                  |                   |                  |                  |                  |                               |
|--------------|----------------------------------|----|--------------------------------------------|------------------|-------------------------------|-------------------|------------------|-------------------|------------------|------------------|------------------|-------------------------------|
|              | Treatment Group                  | N  | Visit 1                                    | Visit 2          | Visit 3                       | Visit 4           | Visit 5          | Visit 6           | Visit 7          | Visit 8          | Visit 9          | Visit 10                      |
| <b>Old</b>   | 1. GnRH Agonist, T-gel           | 15 | 261.0 <sup>^</sup><br>(67.2)               | 241.4<br>(65.5)  | 472.2*<br>(203.5)             | 373.0<br>(120.0)  | 379.4<br>(193.5) | 419.6<br>(278.1)  | 482.8<br>(333.8) | 581.6<br>(584.9) | 347.6<br>(155.2) | 262.2 <sup>#</sup><br>(129.1) |
|              | 2. GnRH Agonist, T-gel, Arimidex | 17 | 278.8 <sup>^</sup><br>(79.8)               | 278.1<br>(70.8)  | 493.2*<br>(133.6)             | 372.7*<br>(103.1) | 513.8<br>(260.5) | 391.7*<br>(169.2) | 407.7<br>(160.9) | 424.0<br>(259.8) | 390.1<br>(147.1) | 293.1 <sup>^</sup><br>(131.2) |
|              | 3. GnRH Agonist, Placebo gel     | 15 | 217.1 <sup>^</sup><br>(44.6)               | 224.9<br>(60.4)  | 414.5 <sup>^</sup><br>(273.3) | 225.3*<br>(156.6) | 79.4<br>(102.7)  | 29.7*<br>(34.0)   | 44.8<br>(76.5)   | 34.0<br>(76.2)   | 10.2<br>(18.2)   | 235.4 <sup>#</sup><br>(84.4)  |
|              | 4. Placebo                       | 15 | 235.2*<br>(64.3)                           | 246.4<br>(80.9)  | 219.9*<br>(72.7)              | 252.4<br>(76.0)   | 234.3*<br>(86.7) | 243.7<br>(78.6)   | 230.7<br>(71.2)  | 222.8<br>(69.3)  | 233.9<br>(63.6)  | 245.5 <sup>+</sup><br>(71.4)  |
| <b>Young</b> | 1. GnRH Agonist, T-gel           | 8  | 344.0*<br>(86.1)                           | 411.0<br>(125.8) | 882.9*<br>(179.9)             | 608.4<br>(109.3)  | 493.0<br>(220.3) | 505.5*<br>(318.2) | 577.4<br>(232.9) | 412.6<br>(125.1) | 541.9<br>(310.2) | 546.7 <sup>+</sup><br>(228.1) |
|              | 2. GnRH Agonist, T-gel, Arimidex | 5  | 332.1*<br>(42.8)                           | 342.8<br>(96.2)  | 882.8*<br>(302.3)             | 613.1<br>(301.1)  | 435.2<br>(404.9) | 363.9<br>(160.4)  | 322.6<br>(199.5) | 325.6<br>(205.5) | 366.7<br>(104.3) | 672.8*<br>(268.5)             |
|              | 3. GnRH Agonist, Placebo gel     | 8  | 386.0*<br>(101.8)                          | 377.9<br>(85.7)  | 641.4<br>(196.7)              | 220.8<br>(115.0)  | 66.6<br>(45.3)   | 15.6*<br>(9.7)    | 10.3*<br>(8.2)   | 10.9<br>(12.0)   | 6.6<br>(6.0)     | 478.8 <sup>^</sup><br>(188.9) |
|              | 4. Placebo                       | 5  | 364.1*<br>(81.4)                           | 361.7<br>(97.4)  | 378.5<br>(106.0)              | 404.6<br>(168.8)  | 375.3<br>(78.9)  | 372.1<br>(132.2)  | 403.6<br>(97.3)  | 331.1<br>(97.4)  | 561.3<br>(329.1) | 369.2*<br>(165.3)             |

\* Batched sample missing for 1 subject; <sup>^</sup> Batched sample missing for 2 subjects; <sup>+</sup> Batched sample missing for 4 subjects; <sup>#</sup> Batched sample missing for 5 subjects. Non-batched samples were also obtained for Visit 1 screening hormone and Visit 10 safety check.

Supplementary Table: Estradiol Levels at each visit by treatment group and age.

|              |                                  |    | Estradiol pg/mL<br>mean (S.D.) |               |                            |                |                |                |                |               |               |                            |
|--------------|----------------------------------|----|--------------------------------|---------------|----------------------------|----------------|----------------|----------------|----------------|---------------|---------------|----------------------------|
|              | Treatment Group                  | N  | Visit 1                        | Visit 2       | Visit 3                    | Visit 4        | Visit 5        | Visit 6        | Visit 7        | Visit 8       | Visit 9       | Visit 10                   |
| <b>Old</b>   | 1. GnRH Agonist, T-gel           | 15 | 17.2 <sup>^</sup><br>(4.2)     | 17.1<br>(5.3) | 26.2*<br>(10.9)            | 19.4<br>(5.5)  | 19.6<br>(5.1)  | 19.7<br>(7.6)  | 22.3<br>(8.4)  | 20.7<br>(5.5) | 19.1<br>(6.4) | 17.9 <sup>+</sup><br>(7.2) |
|              | 2. GnRH Agonist, T-gel, Arimidex | 17 | 18.2 <sup>§</sup><br>(4.6)     | 20.2<br>(4.4) | 33.4*<br>(15.7)            | 15.9*<br>(6.2) | 7.6<br>(3.0)   | 7.4*<br>(2.8)  | 7.5<br>(2.4)   | 7.7<br>(3.0)  | 8.6<br>(3.7)  | 20.5 <sup>^</sup><br>(6.7) |
|              | 3. GnRH Agonist, Placebo gel     | 15 | 18.0 <sup>^</sup><br>(5.1)     | 17.8<br>(4.7) | 26.1 <sup>^</sup><br>(9.5) | 17.0*<br>(5.6) | 11.6<br>(4.8)  | 9.9*<br>(3.7)  | 12.5<br>(7.1)  | 11.1<br>(6.9) | 10.6<br>(3.2) | 17.9 <sup>#</sup><br>(7.1) |
|              | 4. Placebo                       | 15 | 18.7*<br>(5.8)                 | 17.6<br>(5.3) | 16.0*<br>(3.7)             | 16.0<br>(4.4)  | 16.7*<br>(5.5) | 16.4<br>(4.3)  | 18.9<br>(5.4)  | 17.4<br>(4.7) | 17.5<br>(4.0) | 15.7 <sup>+</sup><br>(4.7) |
| <b>Young</b> | 1. GnRH Agonist, T-gel           | 8  | 22.8*<br>(4.2)                 | 24.0<br>(6.2) | 40.5*<br>(13.8)            | 29.7<br>(8.0)  | 25.6<br>(6.8)  | 24.2*<br>(6.6) | 23.4<br>(7.1)  | 22.1<br>(5.5) | 24.8<br>(7.8) | 27.8 <sup>+</sup><br>(8.1) |
|              | 2. GnRH Agonist, T-gel, Arimidex | 5  | 20.7*<br>(6.2)                 | 21.1<br>(4.8) | 33.0*<br>(11.2)            | 22.4<br>(8.6)  | 13.6<br>(5.7)  | 10.2<br>(2.3)  | 14.0<br>(5.0)  | 12.8<br>(1.6) | 10.8<br>(2.4) | 28.4*<br>(7.1)             |
|              | 3. GnRH Agonist, Placebo gel     | 8  | 26.1*<br>(9.3)                 | 26.6<br>(8.5) | 35.9<br>(15.0)             | 24.3<br>(9.4)  | 15.6<br>(6.0)  | 15.6*<br>(2.9) | 16.0*<br>(3.7) | 15.5<br>(3.2) | 15.8<br>(5.4) | 33.0 <sup>^</sup><br>(9.6) |
|              | 4. Placebo                       | 5  | 17.6*<br>(3.4)                 | 19.5<br>(4.6) | 18.8<br>(3.4)              | 20.0<br>(4.8)  | 19.9<br>(4.8)  | 17.0<br>(5.0)  | 20.7<br>(2.8)  | 19.1<br>(3.7) | 22.3<br>(4.7) | 18.1*<br>(4.1)             |

\* Batched sample missing for 1 subject; <sup>^</sup> Batched sample missing for 2 subjects; <sup>§</sup> Batched sample missing for 3 subjects; <sup>+</sup> Batched sample missing for 4 subjects; <sup>#</sup> Batched sample missing for 5 subjects. Non-batched samples were also obtained for Visit 1 screening hormone and Visit 10 safety check.
